# Supplementary material for: Species and tissue specific differences in ROS metabolism to hypoxia- and hyperoxia-recovery exposure in marine sculpins
Source: Oxford University Press journal article supplement (doi:10.1242/jeb.206896), 2019-01-01
Supplement: jeb206896supp.pdf [file jeb206896supp.pdf]

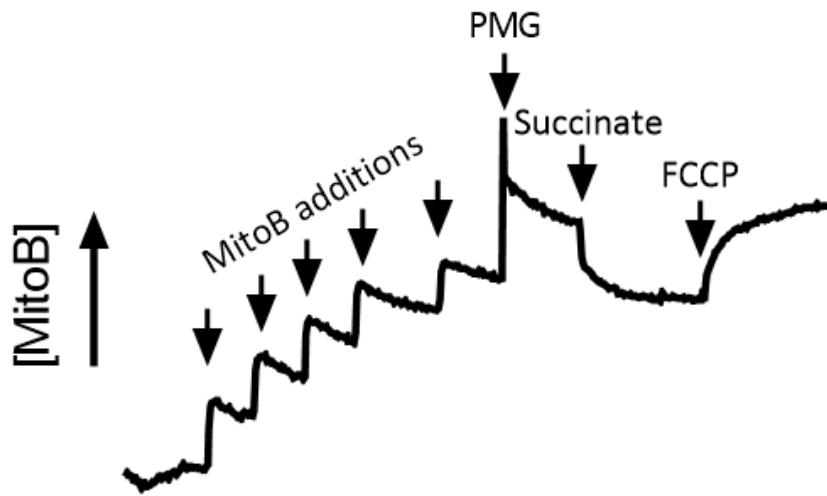

**Figure S1.** MitoB uptake detected with ion-selective electrode specific for detection of  $\text{TPP}^+$  in isolated liver mitochondria of sculpin *Arctedius lateralis*. Sequential additions of MitoB was followed by addition of complex I substrates (pyruvate, malate, and glutamate; PMG), complex II substrate (succinate), and uncoupler carbonyl cyanide 4-(trifluoromethoxy)phenylhydrazone (FCCP). See methods section for details.

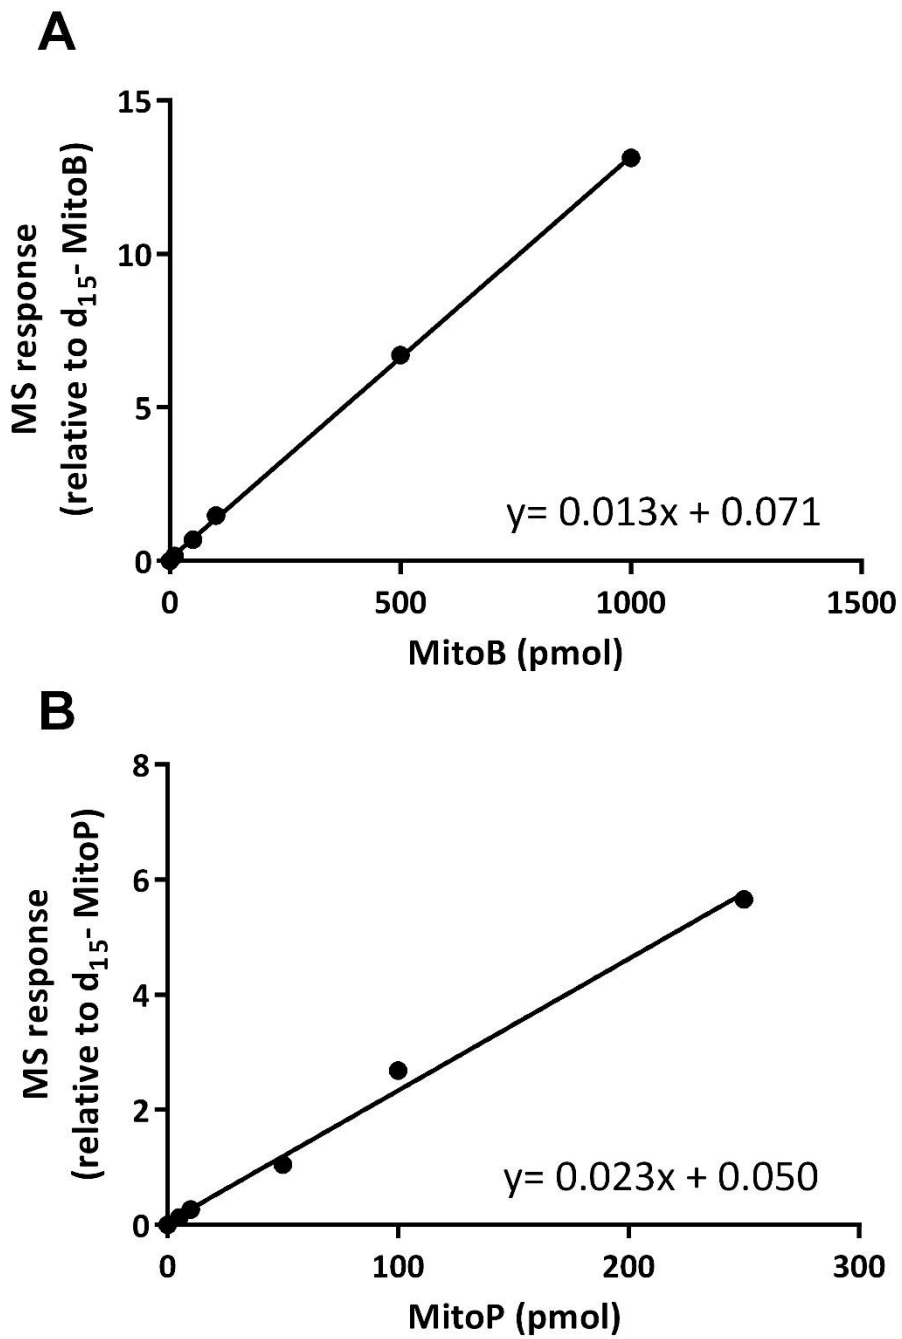

Figure S2. MitoB and MitoP standard curves for LC-MS/MS

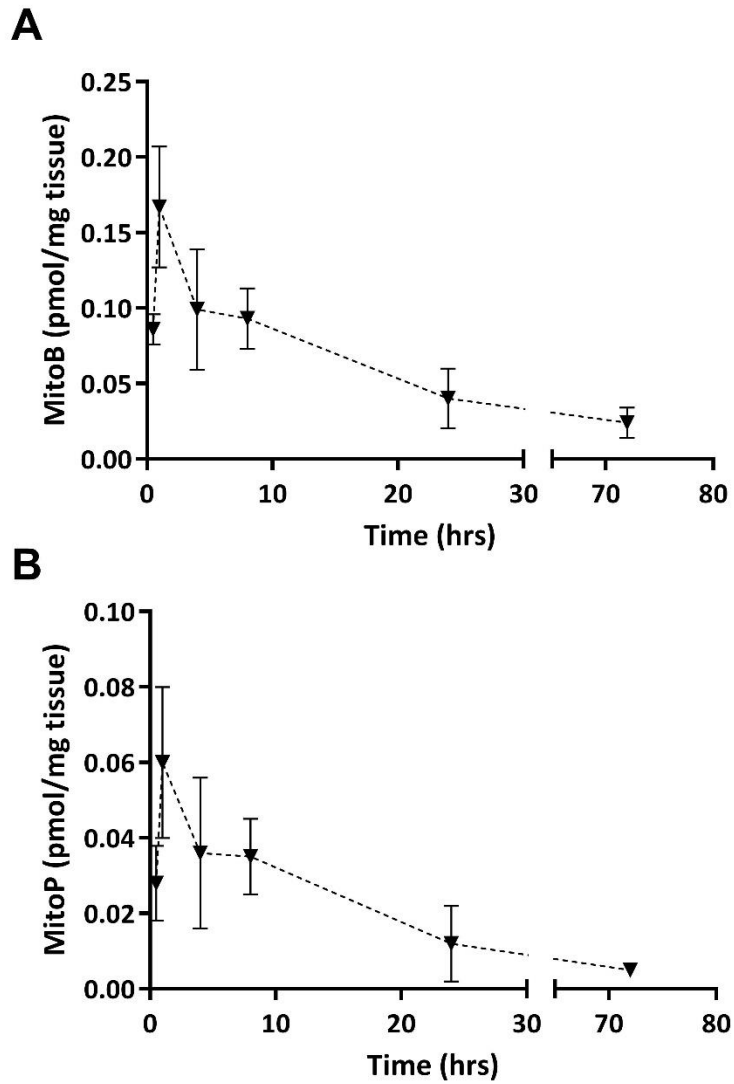

**Figure S3.** White muscle MitoB (top figure), converted MitoP (middle), and MitoP/MitoB (bottom) over 72hr post-injection in normoxic resting *O. maculosus*.

| Tissue                            | Normoxia                    | Hypoxia                     | Hypoxia Recovery            | Normoxia                   | Hyperoxia                   | Hyperoxia Recovery          |
|-----------------------------------|-----------------------------|-----------------------------|-----------------------------|----------------------------|-----------------------------|-----------------------------|
| <i>Oligocottus maculosus</i>      |                             |                             |                             |                            |                             |                             |
| Brain                             | 35.71 ± 3.28 <sup>a</sup>   | 126.88 ± 39.87 <sup>b</sup> | 56.73 ± 9.69 <sup>ab</sup>  | 34.51 ± 3.24 <sup>a</sup>  | 141.40 ± 30.71 <sup>b</sup> | 83.04 ± 21.29 <sup>ab</sup> |
| Liver                             | 30.20 ± 4.49 <sup>a</sup>   | 41.26 ± 11.38 <sup>a</sup>  | 47.41 ± 4.15 <sup>a</sup>   | 38.52 ± 11.65 <sup>a</sup> | 47.72 ± 9.76 <sup>a</sup>   | 27.15 ± 6.40 <sup>a</sup>   |
| Gill                              | 102.79 ± 14.78 <sup>a</sup> | 96.17 ± 15.60 <sup>a</sup>  | 137.42 ± 7.19 <sup>a</sup>  | 96.81 ± 18.71 <sup>a</sup> | 105.45 ± 31.53 <sup>a</sup> | 107.38 ± 25.35 <sup>a</sup> |
| <i>Scorpaenichthys marmoratus</i> |                             |                             |                             |                            |                             |                             |
| Brain                             | 74.62 ± 15.73 <sup>a</sup>  | 58.10 ± 9.19 <sup>a</sup>   | 46.89 ± 5.40 <sup>a</sup>   | 63.79 ± 13.26 <sup>a</sup> | 35.81 ± 10.72 <sup>a</sup>  | 45.28 ± 9.96 <sup>a</sup>   |
| Liver                             | 27.85 ± 7.29 <sup>a</sup>   | 18.60 ± 6.51 <sup>a</sup>   | 36.43 ± 7.76 <sup>a</sup>   | 31.10 ± 5.55 <sup>a</sup>  | 53.19 ± 17.47 <sup>a</sup>  | 54.51 ± 14.39 <sup>a</sup>  |
| Gill                              | 54.32 ± 6.57 <sup>a</sup>   | 142.78 ± 31.56 <sup>a</sup> | 130.60 ± 27.38 <sup>a</sup> | 59.43 ± 10.53 <sup>a</sup> | 114.94 ± 42.83 <sup>a</sup> | 35.65 ± 4.03 <sup>a</sup>   |

**Table S1.** TBARS (in pmol/mg protein) to 3.5 kPa hypoxia-recovery and 64.0 kPa hyperoxia-recovery. One way ANOVA was used to analyse for each tissue the effect of hypoxia -recovery on TBARS .

| Tissue                            | Normoxia                    | Hypoxia                    | Hypoxia Recovery             | Normoxia                    | Hyperoxia                   | Hyperoxia Recovery          |
|-----------------------------------|-----------------------------|----------------------------|------------------------------|-----------------------------|-----------------------------|-----------------------------|
| <i>Oligocottus maculosus</i>      |                             |                            |                              |                             |                             |                             |
| Brain                             | 14.40 ± 0.96 <sup>a</sup>   | 17.00 ± 4.60 <sup>a</sup>  | 12.60 ± 1.28 <sup>a</sup>    | 14.2 ± 0.98 <sup>a</sup>    | 18.00 ± 1.56 <sup>a</sup>   | 17.00 ± 1.92 <sup>a</sup>   |
| Liver                             | 167.80 ± 32.80 <sup>a</sup> | 54.80 ± 22.00 <sup>b</sup> | 120.20 ± 27.00 <sup>ab</sup> | 191.00 ± 24.20 <sup>a</sup> | 156.80 ± 37.80 <sup>a</sup> | 106.2 ± 15.40 <sup>a</sup>  |
| Gill                              | 21.80 ± 1.66 <sup>a</sup>   | 21.60 ± 1.42 <sup>a</sup>  | 23.4 ± 0.60 <sup>a</sup>     | 21.80 ± 3.40 <sup>a</sup>   | 21.60 ± 0.98 <sup>a</sup>   | 22.20 ± 2.80 <sup>a</sup>   |
| <i>Scorpaenichthys marmoratus</i> |                             |                            |                              |                             |                             |                             |
| Brain                             | 15.00 ± 0.76 <sup>a</sup>   | 15.40 ± 1.24 <sup>a</sup>  | 17.40 ± 1.10 <sup>a</sup>    | 17.60 ± 2.40 <sup>a</sup>   | 13.80 ± 1.12 <sup>a</sup>   | 17.20 ± 3.00 <sup>a</sup>   |
| Liver                             | 109.60 ± 3.40 <sup>a</sup>  | 84.80 ± 16.40 <sup>a</sup> | 173.20 ± 39.80 <sup>a</sup>  | 119.80 ± 22.80 <sup>a</sup> | 263.20 ± 57.20 <sup>a</sup> | 201.60 ± 38.80 <sup>a</sup> |
| Gill                              | 23.20 ± 0.50 <sup>a</sup>   | 24.40 ± 3.00 <sup>a</sup>  | 28.20 ± 5.40 <sup>a</sup>    | 26.60 ± 8.20 <sup>a</sup>   | 22.20 ± 3.40 <sup>a</sup>   | 27.00 ± 0.50 <sup>a</sup>   |

**Table S2** TOSC levels (expressed in  $\mu\text{mole H}_2\text{O}_2/\text{min}/\text{mg}$  protein) to 3.5 kPa hypoxia-recovery and 64.0 kPa hyperoxia-recovery. One way ANOVA was used to analyse the effect of hypoxia -recovery on TBARS in each tissue.
